# Supplementary material for: Discovery of potential biomarkers in exhaled breath for diagnosis of type 2 diabetes mellitus based on GC-MS with metabolomics
Source: Royal Society of Chemistry journal article supplement (doi:10.1039/c4ra01422g), 2014-01-01
Supplement: c4ra01422g2.csv [file c4ra01422g2.csv]

Retention Time (min.)	Area
0.027	1126
4.051	56829
4.069	36107
4.088	25405
4.115	34608
4.155	19661
4.175	11772
4.192	62650
4.289	21150
4.318	40223
4.378	12397
4.403	13344
4.436	34147
4.525	31354
4.557	20320
4.608	16851
4.634	8394
4.646	7368
4.677	12135
4.699	6847
4.718	11049
4.783	23940
4.801	10096
4.838	8873
4.858	5949
4.878	7522
4.898	11018
4.945	13365
4.983	13336
5.396	4441
5.764	8632
7.608	927935
7.999	60852
8.485	3.28E+06
8.622	424
9.152	1666
9.509	17288
9.809	78923
11.289	3011
11.586	6648
11.65	9995
12.024	37703
12.863	18967
13.021	152768
13.17	1000
13.333	2730
13.681	5392
13.976	3723
14.242	2656
14.294	7848
15.42	16532
15.534	6974
15.593	31192
15.707	1534
15.86	193585
15.978	286
16.208	48245
16.309	7273
16.872	40782
18.103	20168
18.186	5583
18.271	36550
18.694	6112
18.94	92796
19.065	8444
19.181	56390
19.471	7208
19.528	15126
19.707	68028
19.78	1.10E+06
19.928	3005
20.047	30460
20.093	5326
20.211	4629
20.303	6683
20.391	178890
20.52	37763
20.616	23929
20.822	15151
20.847	21279
21.016	266700
21.201	1529
21.275	101006
21.486	40433
21.547	352243
21.703	72628
21.805	92833
21.901	54097
22.003	542587
22.074	93324
22.173	15029
22.236	38084
22.412	293415
22.503	1067
22.581	77812
22.729	102553
22.835	55136
22.876	61601
22.942	12502
23.028	16158
23.079	11877
23.207	40283
23.334	1.39E+06
23.559	5890
23.68	30080
23.84	29874
23.977	9059
24.098	2431
24.158	4567
24.222	6763
24.302	40260
24.368	8992
24.746	10389
24.863	13136
24.938	72819
25.122	31003
25.178	69027
25.299	19961
25.47	37336
25.574	20200
25.681	44442
25.738	6479
25.798	25716
25.852	4713
25.872	5494
25.897	4548
25.941	11509
25.998	14846
26.022	6031
26.069	10397
26.096	7315
26.129	13248
26.208	12186
26.226	4428
26.249	3391
26.275	9459
26.319	8797
26.368	3586
26.483	29999
26.583	15032
26.63	6119
26.773	12415
26.898	14309
27.737	544153
28.709	1302
31.752	1999
32.006	143320
32.029	16572
32.058	44994
32.086	28404
32.109	28835
32.131	19133
32.148	20714
32.164	18349
32.18	18525
32.196	27936
32.227	34179
32.252	44850
32.298	52709
32.375	46487
32.536	393
33.432	1885
33.981	318
34.324	142616
